# Supplementary material for: Involvement of the R2R3-MYB transcription factor MYB21 and its homologs in regulating flavonol accumulation in Arabidopsis stamen
Source: PubMed Central journal article supplement (PMC8163065; doi:10.1093/jxb/erab156), 2021-04-08
Supplement: erab156_suppl_supplementary_figures_s1-s7_table_s1-s3.pdf [file erab156_suppl_supplementary_figures_s1-s7_table_s1-s3.pdf]

**MYB21-Mediated Flavonol Accumulation Contributes to Stamen Development  
by ROS Scavenging in *Arabidopsis***

Xueying Zhang<sup>1,#</sup>, Yuqing He<sup>1,#</sup>, Linying Li<sup>1</sup>, Gaojie Hong<sup>1,\*</sup>

<sup>1</sup> State Key Laboratory for Managing Biotic and Chemical Threats to the Quality and Safety of Agro-products, Institute of Virology and Biotechnology, Zhejiang Academy of Agricultural Sciences, 198 Shiqiao Road, Hangzhou 310021, China

# These authors contributed equally to this work

\* Corresponding author

## Supplementary data

**Fig. S1.** Overexpression of *Pro35S:MYB21-FLAG* could complement the phenotype of *myb21* mutant. (A) Flowers of the wild-type (Col-0), *myb21*, *Pro35S:MYB21-FLAG/myb21* transgenic plants (*MYB21OE myb21* T2 1-3). (B) Main shoot bearing siliques of wild-type (Col-0), *myb21*, *Pro35S:MYB21-FLAG over-expressing in myb21* (*MYB21OE/myb21* T2 1-3).

**Fig. S2.** The transcription of *MYB21* is enriched in *Arabidopsis* flowers. The gene expression of *MYB21* in root, leaves, sepals, stamen and stigma, respectively, were analyzed by qRT-PCR, and  $\beta$ -*TUBULIN2* was used as the internal standard. Error bars indicate SD of three biological replicates.

**Fig. S3.** The transcripts of *MYB21* and *MYB24* could be detectable in the stamen and pistils of *myb21*. The gene expression of *MYB21* and *MYB24* was analyzed by qRT-PCR, and  $\beta$ -*TUBULIN2* was used as the internal standard. Error bars indicate SD of three biological replicates. \*Student's test,  $P < 0.05$ .

**Fig. S4.** *MYB21* was involved in the regulation on lignin biosynthesis genes. (A) Expression of lignin biosynthesis genes in inflorescences of wild-type (Col-0), *myb21*, *myb24*, *myb57* and *myb21myb24myb57*, *myb11myb12myb111* and *chs* mutants. The transcripts were analyzed by qRT-PCR, and  $\beta$ -*TUBULIN2* was used as the internal standard. Error bars indicate SD of three biological replicates. (B) Expression of lignin biosynthesis genes in inflorescences of wild-type (Col-0) and *MYB21* over-expression plants (*MYB21OE1-3*). The transcripts were analyzed by qRT-PCR, and  $\beta$ -*TUBULIN2* was used as the internal standard. Error bars indicate SD of three biological replicates.

**Fig. S5.** Gene expression of *FLS1* in inflorescences of wild type (Col-0), *myb21*, *FLS1OE1myb21* and *FLS1OE2myb21*, respectively. Error bars indicate SD of three biological replicates.

**Fig. S6.** Both *myb11myb12myb111* and *chs* plants shows normal stamen development. (A) Phenotype of flowers. (B) Main shoot bearing siliques. (C) The ratio of filament length to pistil length. Error bars indicate SD of three biological replicates. Bars marked by different letters are significantly different,  $P < 0.05$ . (D) Percentage of silique with seeds. Error bars indicate SD of three biological replicates. Bars marked by different letters are significantly different,  $P < 0.05$ .

**Fig. S7.** MYB21 and MYB11/MYB12/MYB111 probably mediate the biosynthesis of phenylpropanoid metabolites in their own distinct way. (A) Gene expression of *MYB11*, *MYB12*, *MYB111* and *MYB21* in inflorescences of wild-type (Col-0), *myb21*, *myb21myb24myb57* and *myb11myb12myb111*, respectively. (B) *In situ* flavonol staining of wild-type (Col-0), *myb21*, *myb21myb24myb57* and *myb11myb12myb111* pollen grains, respectively. Flavonols in ethanol-bleached inflorescences were stained with diphenylboric acid 2-aminoethylester (DPBA) to saturation and imaged by inverted fluorescence microscope.

**Table S1.** Oligonucleotide primer sequences.

**Table S2.** The quantitative UPLC/Q-TOF MS data of different flavonol derivatives.

**Table S3.** The flavonol profiles in methanol-water extracts.

## Supplementary Figures

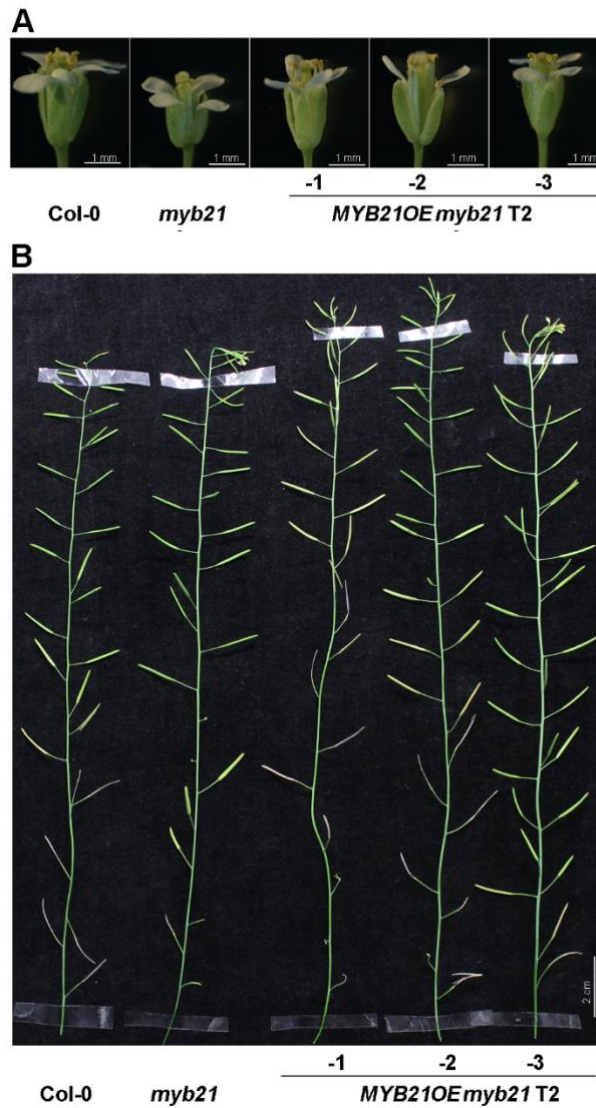

**Fig. S1.** Overexpression of *Pro35S:MYB21-FLAG* could complement the phenotype of *myb21* mutant. (A) Flowers of the wild-type (Col-0), *myb21*, *Pro35S:MYB21-FLAG/myb21* transgenic plants (*MYB21OE myb21* T2 1-3). (B) Main shoot bearing siliques of wild-type (Col-0), *myb21*, *Pro35S:MYB21-FLAG* over-expressing in *myb21* (*MYB21OE/myb21* T2 1-3).

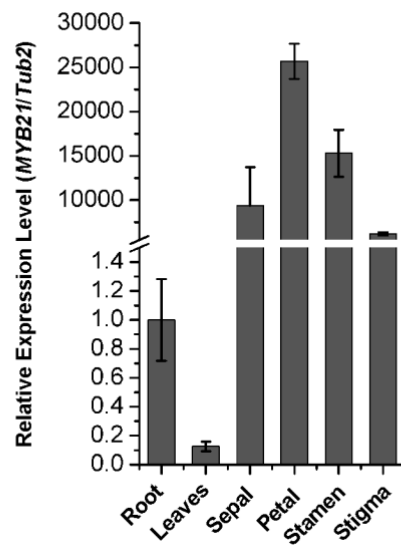

**Fig. S2.** The transcription of *MYB21* is enriched in *Arabidopsis* flowers. The gene expression of *MYB21* in root, leaves, sepals, stamen and stigma, respectively, were analyzed by qRT-PCR, and  $\beta$ -*TUBULIN2* was used as the internal standard. Error bars indicate SD of three biological replicates.

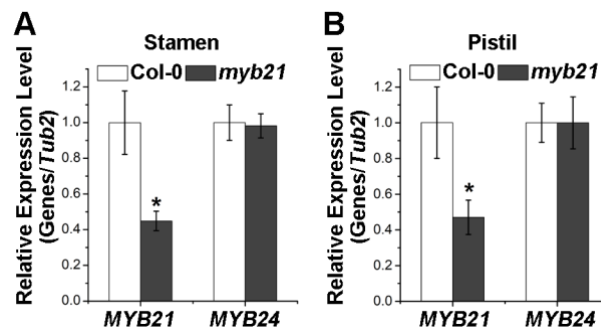

**Fig. S3.** The transcripts of *MYB21* and *MYB24* could be detectable in the stamen and pistils of *myb21*. The gene expression of *MYB21* and *MYB24* was analyzed by qRT-PCR, and  $\beta$ -*TUBULIN2* was used as the internal standard. Error bars indicate SD of three biological replicates. \*Student's test,  $P < 0.05$ .

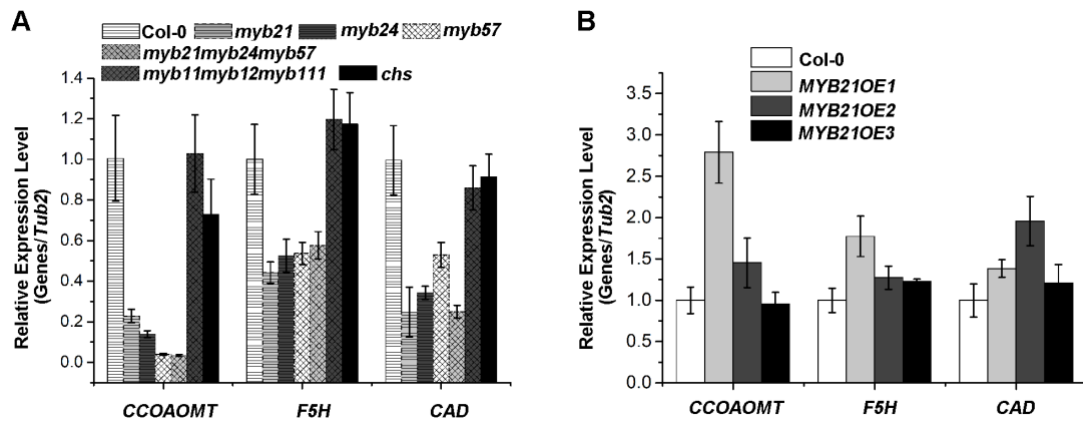

**Fig. S4.** MYB21 was involved in the regulation on lignin biosynthesis genes. (A) Expression of lignin biosynthesis genes in inflorescences of wild-type (Col-0), *myb21*, *myb24*, *myb57* and *myb21myb24myb57*, *myb11myb12myb111* and *chs* mutants. The transcripts were analyzed by qRT-PCR, and  $\beta$ -*TUBULIN2* was used as the internal standard. Error bars indicate SD of three biological replicates. (B) Expression of lignin biosynthesis genes in inflorescences of wild-type (Col-0) and *MYB21* over-expression plants (*MYB21OE1-3*). The transcripts were analyzed by qRT-PCR, and  $\beta$ -*TUBULIN2* was used as the internal standard. Error bars indicate SD of three biological replicates.

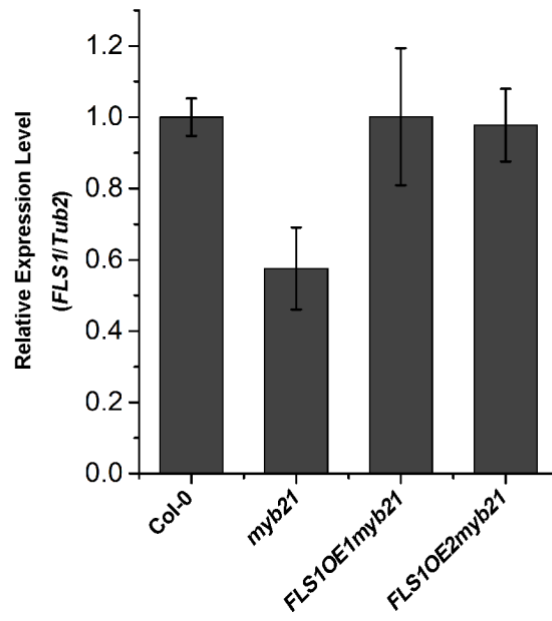

**Fig. S5.** Gene expression of *FLS1* in inflorescences of wild type (Col-0), *myb21*, *FLS1OE1myb21* and *FLS1OE2myb21*, respectively. Error bars indicate SD of three biological replicates.

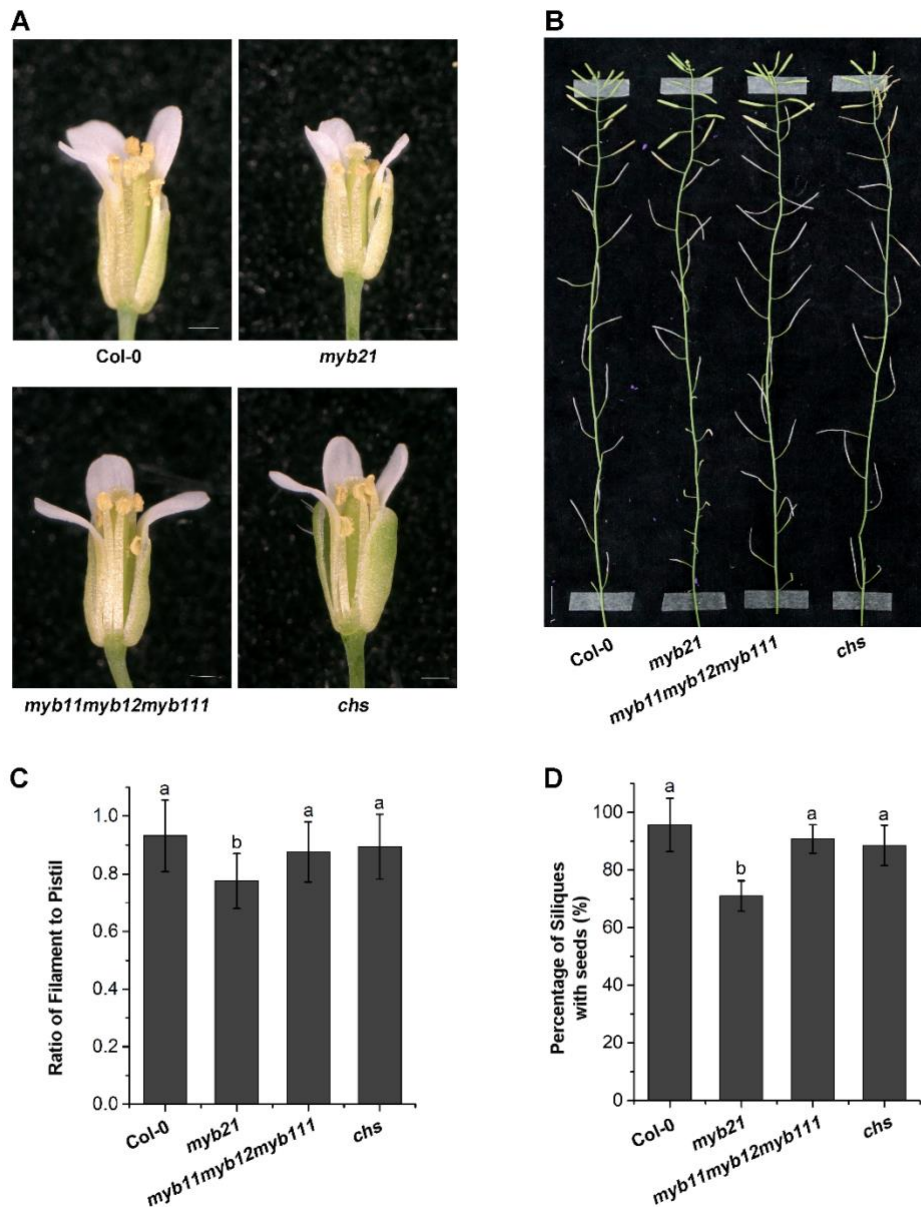

**Fig. S6.** Both *myb11myb12myb111* and *chs* plants shows normal stamen development. (A) Phenotype of flowers. (B) Main shoot bearing siliques. (C) The ratio of filament length to pistil length. Error bars indicate SD of three biological replicates. Bars marked by different letters are significantly different,  $P < 0.05$ . (D) Percentage of silique with seeds. Error bars indicate SD of three biological replicates. Bars marked by different letters are significantly different,  $P < 0.05$ .



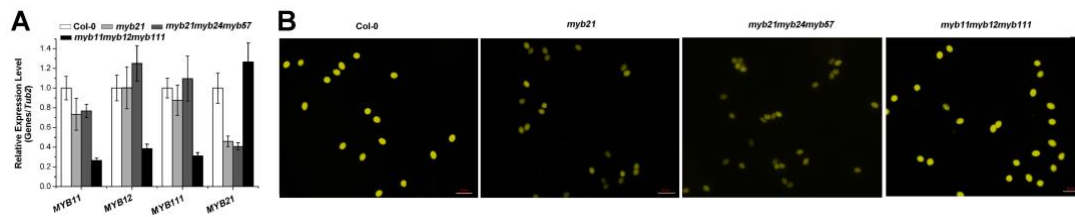

**Fig. S7.** MYB21 and MYB11/MYB12/MYB111 probably mediate the biosynthesis of phenylpropanoid metabolites in their own distinct way. (A) Gene expression of *MYB11*, *MYB12*, *MYB111* and *MYB21* in inflorescences of wild-type (Col-0), *myb21*, *myb21myb24myb57* and *myb11myb12myb111*, respectively. (B) *In situ* flavonol staining of wild-type (Col-0), *myb21*, *myb21myb24myb57* and *myb11myb12myb111* pollen grains, respectively. Flavonols in ethanol-bleached inflorescences were stained with diphenylboric acid 2-aminoethylester (DPBA) to saturation and imaged by inverted fluorescence microscope.

**Table S1. Primers used in this study**

| <b>Primer names</b>   | <b>Primer sequence</b>                               |
|-----------------------|------------------------------------------------------|
| Pro35S:MYB21-FLAG-F   | ATGGAGAAAAGAGGAGGAGGAAG                              |
| Pro35S:MYB21-FLAG-R   | ATTACCATTCAATAAATGCATTG                              |
| ProALcA:MYB21-F       | GGGGTACCAATATGCGAATTAGCCTCTCACC                      |
| ProALcA:MYB21-R       | ACGCGTCGACTATTTTTTTTGGTAGTTTGCGTTGCC                 |
| ProFLS-GUS-F          | CCGCTCGAGAATATGCGAATTAGCCTCTCACC                     |
| ProFLS-GUS-R          | CGGGATCCTATTTTTTTTGGTAGTTTGCGTTGCC                   |
| MYB21-GST-F           | CGGGATCCATGGAGAAAAGAGGAGGAGGAAG                      |
| MYB21-GST-R           | ACGCGTCGACTCAATTACCATTCAATAAATGCA                    |
| GARE1-EMSA-F          | AGCCAGTGGCGATAAGCTCTCACCTTTTTTTTGTATTATATCTTAAG      |
| GARE1-EMSA-R          | CTTAAGATATAAAATAACAAAAAAGGTGAGAGCTTATCGCCACTGGCT     |
| GARE1mut-EMSA-F       | AGCCAGTGGCGATAAGCTCTCACCTTTTTTATCTCCTTTTATATCTTAAG   |
| GARE1mut-EMSA-R       | CTTAAGATATAAAAGGAGATAAAAAAGGTGAGAGCTTATCGCCACTGGCT   |
| GARE2-EMSA-F          | AGCCAGTGGCGATAAGCTGGGCCTTGTCCTTGTATTATATGGGCCTTGAATC |
| GARE2-EMSA-R          | GATTCAAGGCCCATATAACAAGACAAGGCCAGCTTATCGCCACTGGCT     |
| GARE2mut-EMSA-F       | AGCCAGTGGCGATAAGCTGGGCCTTGTCATCTCCTATGGGCCTTGAATC    |
| GARE2mut-EMSA-R       | GATTCAAGGCCCATAGGAGATGACAAGGCCAGCTTATCGCCACTGGCT     |
| biotin-labeled probes | AGCCAGTGGCGATAAG                                     |
| pHis2.1:FLSpro-F      | CGGAATTCAATATGCGAATTAGCCTCTCACC                      |
| pHis2.1:FLSpro-R      | GACTAGTTATTTTTTTTGGTAGTTTGCGTTGCC                    |
| pHis2.1:GARE-F        | CGGAATTCGCCTCTCACCTTTTTTTTGTTA                       |
| pHis2.1:GARE-R        | GACTAGTCAAGGCCCATATAACAAGACAAG                       |
| pHis2.1:PYTA-F        | CGGAATTCAACATCACTTTTTTTCCTTTTC                       |

|                |                                                             |
|----------------|-------------------------------------------------------------|
| pHis2.1:PYTA-R | GACTAGTGAAATCTTGGCCGCTGGATAGAG                              |
| MYB21rec-F     | GAATTCCACCCAAGCAGTGGTATCAACGCAGAGTGGATGGAGAAAAGAGGAGGAGGAAG |
| MYB21rec-R     | ATCGATGCCACCCTCTAGAGGCCGAGGCGGCCGACTCAATTACCATTCAATAAATGCA  |
| MYB21-F        | GGGGTACCAATATGCGAATTAGCCTCTCACC                             |
| MYB21-R        | ACGCGTCGACTATTTTTTTTGGTAGTTTGCCTTGCC                        |
| MYB24-F        | GGGGTACCCTCACTTTCACAACCTCTCCCTTTC                           |
| MYB24-R        | ACGCGTCGACGAGGCAATCCCATACAGTACTCTG                          |
| MYB57-F        | GGGGTACCCTATATAGTCGCAAGTCTCAACCC                            |
| MYB57-R        | ACGCGTCGACCCAGAAGTTACTCAAACACCACC                           |
| MYB99-F        | GAGAACACGGAGCTCGGTACCATGGGTGGTCGTAAACCATGTTG                |
| MYB99-R        | CAGGTGCGACTCTAGAGGATCCCTAAACATCGAAACATCCA                   |
| ProFLS-F       | CCGCTCGAGAATATGCGAATTAGCCTCTCACC                            |
| ProFLS-R       | CGGGATCCTATTTTTTTTGGTAGTTTGCCTTGCC                          |
| GARE1-CHIP-F   | TGCGAATTAGCCTCTCACCT                                        |
| GARE1-CHIP-R   | CTCTAAAACAGCAACACCTG                                        |
| GARE2-CHIP-F   | CCTATACTGTAGTTTTTCCT                                        |
| GARE2-CHIP-R   | CCAACCCCATTTAAAGCTAAAG                                      |
| PY-CHIP-F      | CACCCGCCAAAAATATGTAC                                        |
| PY-CHIP-R      | CTCACGAGTTTGGTACCAAG                                        |
| TA-CHIP-F      | CGACGACTTACACATATCAAC                                       |
| TA-CHIP-R      | GTTACGAGTGGTTTTAAGGAG                                       |
| ACT8-ChIP-F    | CCCGCCTATATAAATAGTTCAACAC                                   |
| ACT8-ChIP-R    | GACGACGAGGCAATTCAAAG                                        |
| MYB21-qRT-F    | AGGAGGAAGTAGTGGAGGTT                                        |
| MYB21-qRT-R    | CCGTGGTTGGCGATATAGTT                                        |

|               |                          |
|---------------|--------------------------|
| MYB24-qRT-F   | ATGCAAAATGGGGAAATAGGTG   |
| MYB24-qRT-R   | AAGATCATCGACGCTCCAATAGTT |
| FLS1-qRT-F    | CCACCGTCATGCGTCAATTACAG  |
| FLS1-qRT-R    | TCTCCGCCGAGACCTTCTTTCAA  |
| CHS-qRT-F     | GGAGAAGTTCAAGCGCATGTG    |
| CHS-qRT-R     | ATGTGACGTTTCCGAATTGTCG   |
| CHI-qRT-F     | CTCTCTTACGGTTGCGTTTTTCG  |
| CHI-qRT-R     | CACCGTTCTTCCCGATGATAGA   |
| F3H-qRT-F     | AGGAGGATTCATCGTCTCTAGT   |
| F3H-qRT-R     | CACCGTGAGTAGTCTCTGTTTC   |
| F3'H-qRT-F    | TTCCTTACCTTCAGGCGGTTATC  |
| F3'H-qRT-R    | CGAGAGTGGTGTGGTGGATG     |
| FLS3-qRT-F    | ATGGAATGGTTATCAGAAGGA    |
| FLS3-qRT-R    | GACACGGCGGATAGTAAT       |
| UGT78D1-qRT-F | GGCAGAGATAGAAGTTGGA      |
| UGT78D1-qRT-R | GTAGAGATGAGCACAGAGT      |
| UGT78D2-qRT-F | TCCTACATTGACGAATAACCT    |
| UGT78D2-qRT-R | GCCACAGAACCAGAAGAT       |
| UGT79B6-qRT-F | CAAGGTCTCGGTAGAGGTGAAAA  |
| UGT79B6-qRT-R | CGCTCAAGCTCTCCTTCGAA     |
| CCoAOMT-qRT-F | GGTTACTCGCTTCTCACT       |
| CCoAOMT-qRT-R | ACTCACATTTGTCGTTTAC      |
| CAD-qRT-F     | TCACTCCTCTGCTTATGC       |
| CAD-qRT-R     | TCTCCTCTGTCTCCTTCA       |
| AtF5H-qRT-F   | GCCTTAACGGAGTTATTACG     |

|               |                             |
|---------------|-----------------------------|
| AtF5H-qRT-R   | CGATGTCGGATTCTTCAAC         |
| AtMYB99-q-F   | TCCGGTGGACTAATTATCTCCG      |
| AtMYB99-q-R   | TCTATTGCCAAGGCGAGCAT        |
| AtMYB11-q-F   | ACTCCACGGTACTTCAG           |
| AtMYB11-q-R   | CTTCCAGGTCTACGCTTA          |
| AtMYB12-q-F   | ATTATTGGA ACTCTCATCTCAG     |
| AtMYB12-q-R   | TTCATAGCGGACCTACTC          |
| AtMYB111-q-F  | ATCCTCACCAAGTATATTCAGA      |
| AtMYB111-q-R  | TCCACATCTCAACAATCCA         |
| Tubulin-qRT-F | GAGCCTTACAACGCTACTCTGTCTGTC |
| Tubulin-qRT-R | ACACCAGACATAGTAGCAGAAATCAAG |

---

**Table S2. The quantitative UPLC/Q-TOF MS data of different flavonol derivatives.**

|                           | <b>Col-0</b> | <i>myb21</i> | <i>myb24</i> | <i>myb57</i> | <i>myb21myb24myb57</i> | <i>myb11myb12myb111</i> |
|---------------------------|--------------|--------------|--------------|--------------|------------------------|-------------------------|
| <b>Isorhamnetin-3G-7R</b> | 0.57±0.054   | 0.35±0.065*  | 0.55±0.023   | 0.42±0.069*  | 0.38±0.018*            | 0                       |
| <b>Isorhamnetin-3R-7R</b> | 0.22±0.033   | 0.14±0.026*  | 0.21±0.032   | 0.15±0.018*  | 0.15±0.012*            | 0                       |
| <b>Q-3RG-7R</b>           | 0.08±0.025   | 0.04±0.032   | 0.06±0.02    | 0.06±0.027   | 0.05±0.005*            | 0                       |
| <b>K-3RG-7R</b>           | 0.56±0.036   | 0.4±0.047**  | 0.52±0.052   | 0.5±0.066    | 0.37±0.048**           | 0                       |
| <b>Q-3G-hexose</b>        | 0.13±0.044   | 0.05±0.011** | 0.12±0.036   | 0.08±0.038*  | 0.06±0.013**           | 0.11±0.033              |
| <b>K-3G-hexose</b>        | 0.3±0.077    | 0.17±0.02*   | 0.3±0.041    | 0.24±0.033   | 0.17±0.039*            | 0.31±0.016              |
| <b>Q-3G-7R</b>            | 0.37±0.069   | 0.31±0.073   | 0.35±0.084   | 0.27±0.091   | 0.34±0.03              | 0                       |
| <b>K-3G-7R</b>            | 0.52±0.042   | 0.5±0.061    | 0.46±0.048*  | 0.47±0.047   | 0.42±0.053*            | 0                       |
| <b>Q-3R-7R</b>            | 0.49±0.134   | 0.35±0.049** | 0.45±0.028   | 0.43±0.089   | 0.4±0.041*             | 0                       |
| <b>K-3R-7R</b>            | 1.02±0.075   | 0.79±0.089*  | 1.03±0.097   | 0.81±0.21    | 0.67±0.019**           | 0                       |
| <b>Total</b>              | 4.26±0.233   | 3.1±0.295*   | 4.05±0.182   | 3.43±0.127*  | 3.01±0.203**           | 0.42±0.03               |

|                           | <b>Col-0</b> | <i>MYB21OE1</i> | <i>MYB21OE2</i> | <i>MYB21OE3</i> |
|---------------------------|--------------|-----------------|-----------------|-----------------|
| <b>Isorhamnetin-3G-7R</b> | 0.63±0.07    | 0.53±0.038      | 0.55±0.079      | 0.59±0.006      |
| <b>Isorhamnetin-3R-7R</b> | 0.18±0.0102  | 0.2±0.024       | 0.22±0.021      | 0.29±0.028*     |
| <b>Q-3RG-7R</b>           | 0.07±0.0054  | 0.07±0.011      | 0.1±0.062       | 0.13±0.01*      |
| <b>K-3RG-7R</b>           | 0.49±0.0048  | 0.52±0.056      | 0.55±0.003**    | 0.63±0.055      |
| <b>Q-3G-hexose</b>        | 0.11±0.0168  | 0.15±0.007      | 0.16±0.016      | 0.15±0.019      |
| <b>K-3G-hexose</b>        | 0.35±0.0517  | 0.38±0.008      | 0.38±0.013      | 0.52±0.106      |
| <b>Q-3G-7R</b>            | 0.46±0.0008  | 0.43±0.062      | 0.43±0.008*     | 0.52±0.134      |
| <b>K-3G-7R</b>            | 0.54±0.0027  | 0.78±0.17       | 0.67±0.001**    | 0.66±0.044      |
| <b>Q-3R-7R</b>            | 0.25±0.0011  | 0.36±0.254      | 0.54±0.005**    | 0.43±0.02**     |
| <b>K-3R-7R</b>            | 0.88±0.1347  | 1.01±0.142      | 0.94±0.003      | 0.97±0.023      |
| <b>Total</b>              | 3.96±0.034   | 4.42±0.071*     | 4.54±0.11*      | 4.88±0.11**     |

|                           | <b>Col-0</b> | <i>myb21</i>  | <i>FLS1OE1myb21</i> | <i>FLS1OE2myb21</i> |
|---------------------------|--------------|---------------|---------------------|---------------------|
| <b>Isorhamnetin-3G-7R</b> | 0.54±0.076   | 0.35±0.05*    | 0.46±0.068          | 0.47±0.062          |
| <b>Isorhamnetin-3R-7R</b> | 0.16±0.029   | 0.15±0.0068   | 0.16±0.034          | 0.18±0.006          |
| <b>Q-3RG-7R</b>           | 0.07±0.001   | 0.05±0.0033*  | 0.05±0.022          | 0.05±0.021          |
| <b>K-3RG-7R</b>           | 0.51±0.024   | 0.34±0.0331** | 0.55±0.02           | 0.51±0.067          |
| <b>Q-3G-hexose</b>        | 0.11±0.005   | 0.08±0.0142*  | 0.12±0.006          | 0.11±0.014          |
| <b>K-3G-hexose</b>        | 0.32±0.002   | 0.2±0.0105*   | 0.33±0.014          | 0.33±0.012          |
| <b>Q-3G-7R</b>            | 0.45±0.009   | 0.17±0.0802** | 0.48±0.05           | 0.45±0.088          |
| <b>K-3G-7R</b>            | 0.56±0.028   | 0.34±0.0457*  | 0.6±0.018           | 0.56±0.08           |
| <b>Q-3R-7R</b>            | 0.19±0.061   | 0.19±0.0625   | 0.20±0.261          | 0.13±0.037          |
| <b>K-3R-7R</b>            | 0.95±0.03    | 0.83±0.1373   | 1.02±0.172          | 1.13±0.133          |
| <b>Total</b>              | 3.86±0.234   | 2.75±0.478*   | 3.97±0.399          | 3.92±0.305          |

HPLC determination of mean flavonol composition ±SD of Arabidopsis inflorescences divided into sections. Means±SD, n=3, Asterisks indicate significant differences in flavonol derivatives between WT and other genotypes (\*\* $P < 0.01$ , \* $P < 0.05$ ; Student's  $t$ -test). The content of different flavonol derivatives with mg/g fresh weight.



**Table S3. The flavonol profiles in methanol-water extracts**

| <b>Compound Name</b>        | <b>v (min)</b> | <b>ESI-MS(m/z)</b> | <b>Fragments(m/z)</b> |
|-----------------------------|----------------|--------------------|-----------------------|
| <b>Q-3RG-7R</b>             | <b>9.29</b>    | <b>757</b>         | <b>611, 449, 303</b>  |
| <b>K-3RG-7R</b>             | <b>10</b>      | <b>741</b>         | <b>595, 433</b>       |
| <b>Q-3GG</b>                | <b>12.02</b>   | <b>627</b>         | <b>465, 303</b>       |
| <b>Isorhamnetin-3G-7R</b>   | <b>13.37</b>   | <b>625</b>         | <b>463, 317</b>       |
| <b>Q-3G-7R</b>              | <b>11.14</b>   | <b>611</b>         | <b>449, 303</b>       |
| <b>K-3GG</b>                | <b>13.78</b>   | <b>611</b>         | <b>449, 287</b>       |
| <b>Isorhamnetin-3R-7R</b>   | <b>16</b>      | <b>609</b>         | <b>463, 317</b>       |
| <b>K-3G-7R</b>              | <b>12.89</b>   | <b>595</b>         | <b>433, 287</b>       |
| <b>Q-3R-7R</b>              | <b>13.23</b>   | <b>595</b>         | <b>449, 303</b>       |
| <b>K-3R-7R</b>              | <b>15.39</b>   | <b>579</b>         | <b>433, 287</b>       |
| <b>Sinapoyl derivatives</b> | <b>10</b>      | <b>369</b>         | <b>207</b>            |
